# Supplementary material for: The Positive Correlation of the Enhanced Immune Response to PCV2 Subunit Vaccine by Conjugation of Chitosan Oligosaccharide with the Deacetylation Degree
Source: Mar Drugs. 2017 Jul 26;15(8):236. doi: 10.3390/md15080236 (PMC5577591; doi:10.3390/md15080236)
Supplement: Supplementary file 1 [file marinedrugs-15-00236-s001.pdf]

# **Supplementary Information**

## **Files in this data supplement**

Supplementary Fig. 1

Supplementary Fig. 2

Supplementary Fig. 3

Supplementary Fig. 4

Supplementary Fig. 5

Supplementary Fig. 6

Supplementary Table 1

Fig.1. The structure of partially deacetylated COS. DD, a copolymer characterized by the average deacetylation degree.

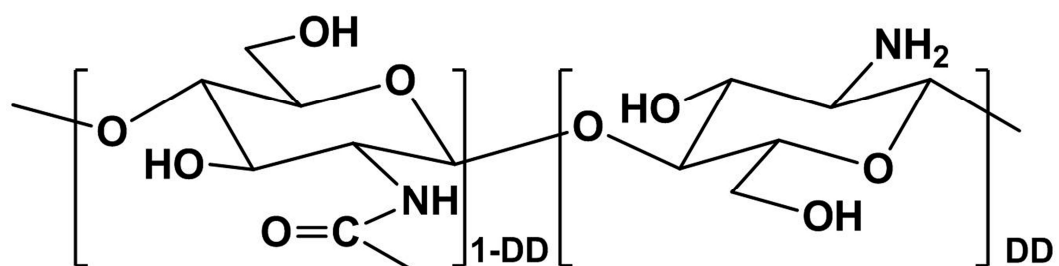

Fig. 2. Determination of the component information of COSs by TOF-MS spectroscopy.

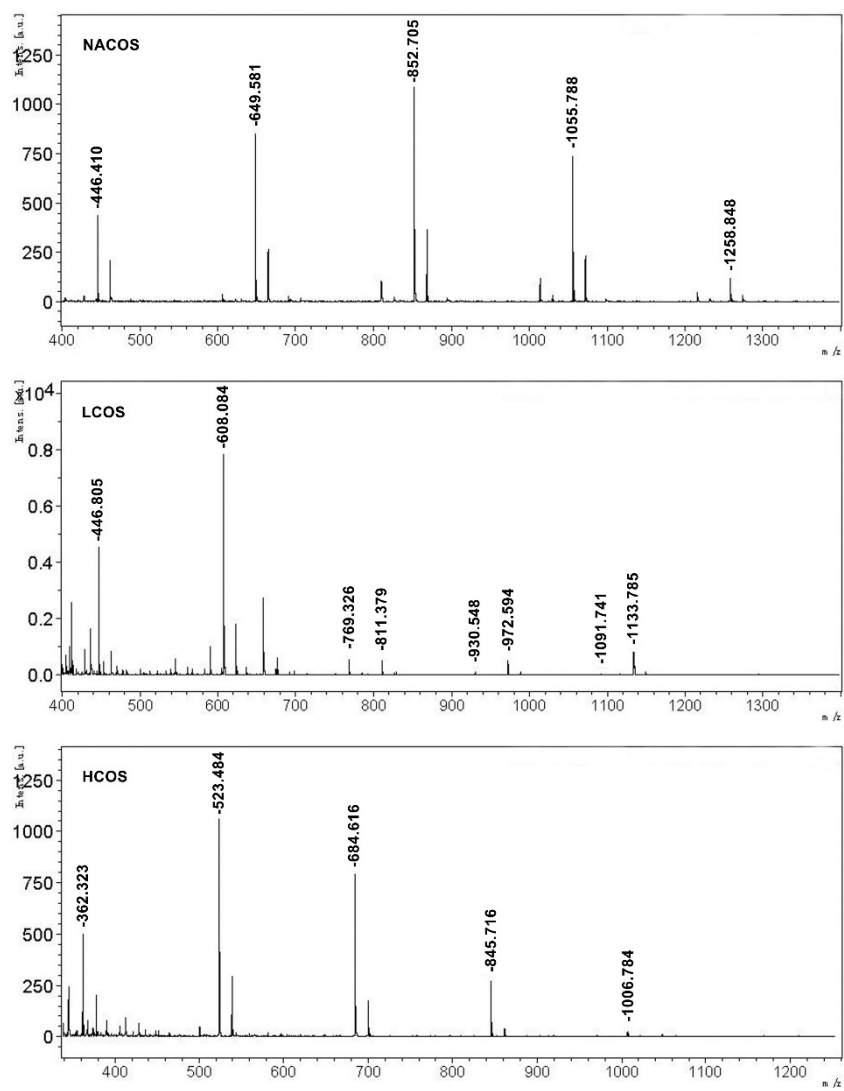

Fig. 3. The average molecular weights were below 1 kDa by HPLC using ELSD detection on a TSKgel G4000PWXL (Tosoh corporation) column (7.8 mm× 300 mm), with 1 k, 5 k and 25 kDa dextran as standards.

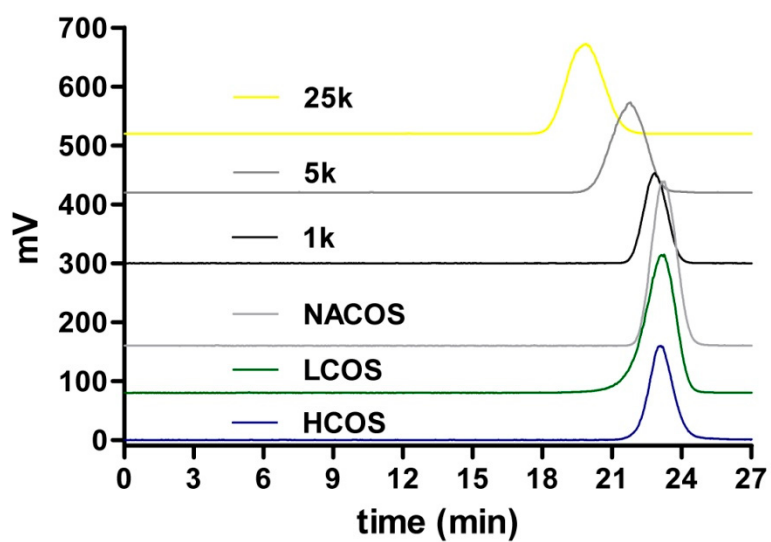

Fig. 4. Determination of the deacetylation degree (DD) of COSs by  $^1\text{H}$ -NMR spectroscopy. The DD was calculated using the peak integration of proton H2-6 of both monomers at 3.0-4.0 ppm and three protons of the acetyl group at 2.1 ppm.

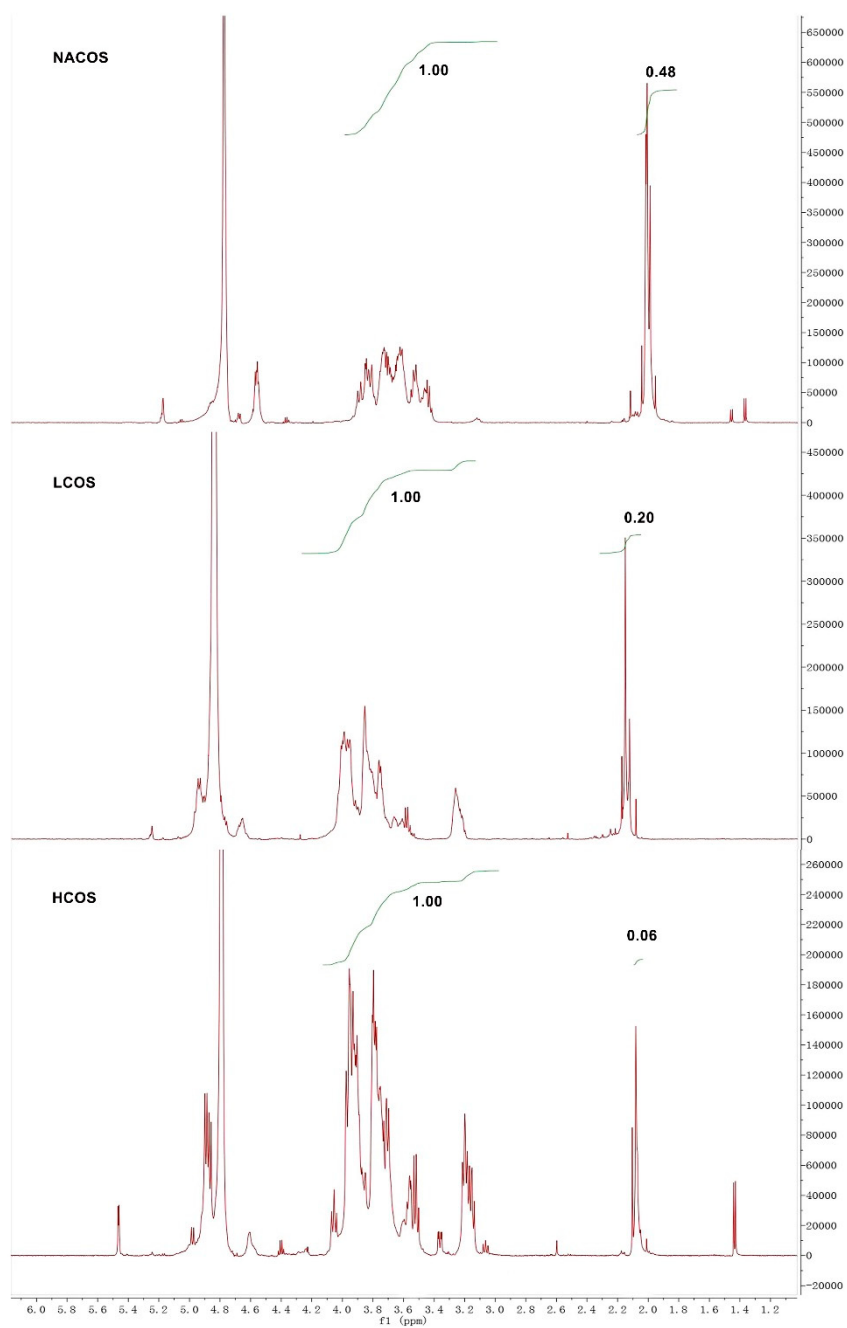

Fig. 5. Effect of COS conjugation on CD3<sup>+</sup>CD4<sup>+</sup> T cell population from mouse spleens by flow cytometry analysis. On day 14 after the third immunization, mice were euthanized and splenic lymphocytes were prepared. The CD3<sup>+</sup>CD4<sup>+</sup> T cell population was determined by flow cytometry analysis. Numbers in each quadrant show percentages of CD3<sup>-</sup>CD4<sup>+</sup> (Upper Left), CD3<sup>+</sup>CD4<sup>+</sup> (Upper Right), CD3<sup>+</sup>CD4<sup>-</sup> (Lower Left), CD3<sup>-</sup>CD4<sup>-</sup> (Lower Right), stained with APC-conjugated monoclonal antibody against CD3 and FITC-labelled monoclonal antibody against CD4.

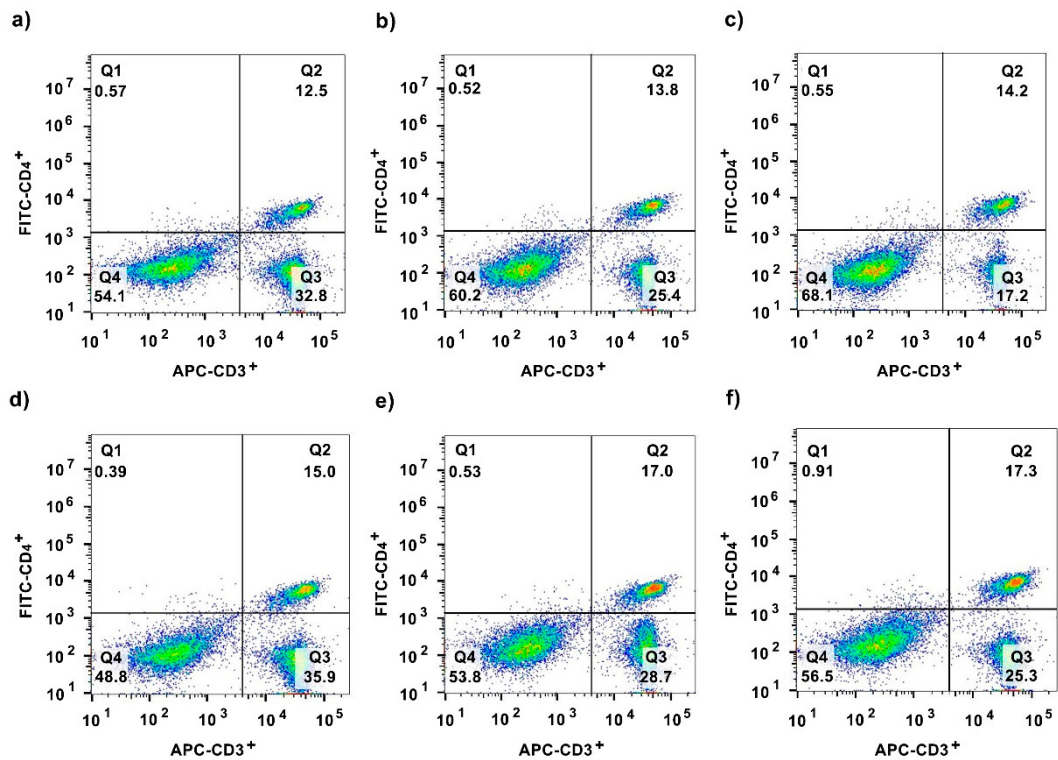

Fig. 6. Effect of COS conjugation on CD3<sup>+</sup>CD8<sup>+</sup> T cell population from mouse spleens by flow cytometry analysis. On day 14 after the third immunization, mice were euthanized and splenic lymphocytes were prepared. And the CD3<sup>+</sup>CD8<sup>+</sup> T cell population was determined by flow cytometry analysis. Numbers in each quadrant show percentages of CD3<sup>-</sup>CD8<sup>+</sup> (Upper Left), CD3<sup>+</sup>CD8<sup>+</sup> (Upper Right), CD3<sup>+</sup>CD8<sup>-</sup> (Lower Left), CD3<sup>-</sup>CD8<sup>-</sup> (Lower Right), stained with APC-conjugated monoclonal antibody against CD3 and PE-labelled monoclonal antibody against CD8.

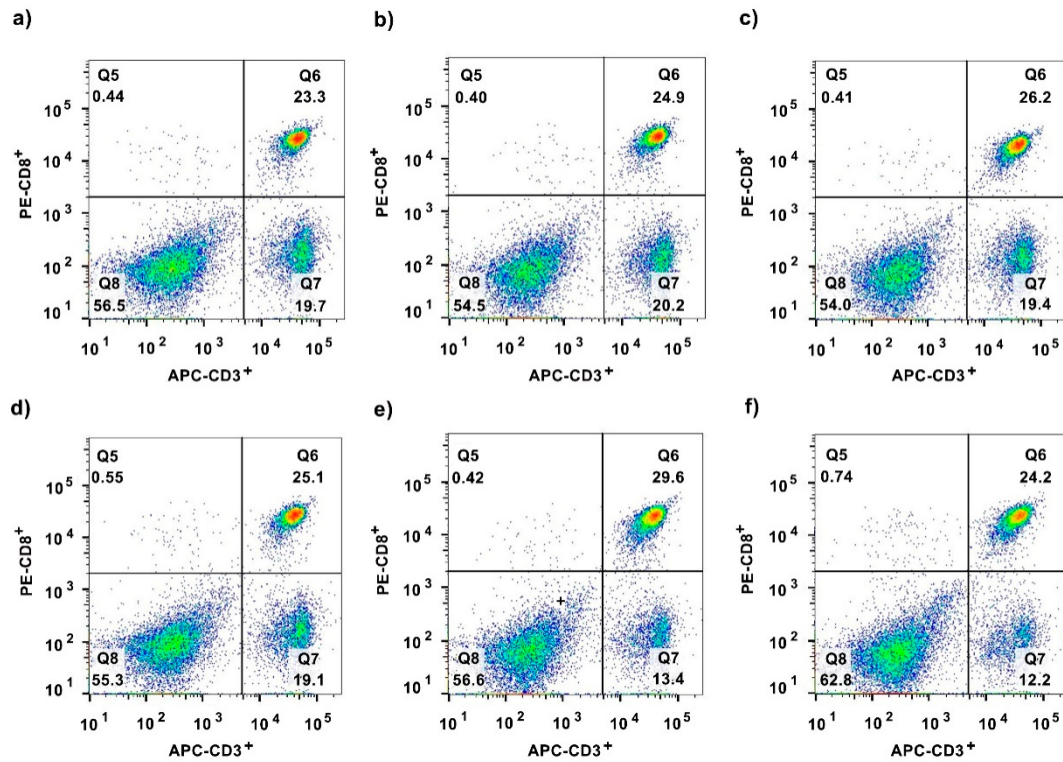

## Tables

Table 1. Effect of COS conjugation on the ratio of PCV2-specific IgG2a to IgG1 in mouse serum after immunization

| Groups      | 14 dpi     | 28 dpi     | 42 dpi      |
|-------------|------------|------------|-------------|
| PBS         | 0.60±0.06  | 0.63±0.08  | 0.66±0.05   |
| PCV2        | 0.48±0.05  | 0.46±0.02  | 0.48±0.03   |
| NACOS-PCV2  | 0.43±0.05* | 0.53±0.04* | 0.55±0.06*  |
| LCOS-PCV2   | 0.52±0.04  | 0.47±0.05  | 0.57±0.04*  |
| HCOS-PCV2   | 0.47±0.04  | 0.50±0.05* | 0.64±0.05** |
| ISA206/PCV2 | 0.55±0.08* | 0.52±0.08  | 0.56±0.09   |

The IgG2a/IgG1 ratio for each mouse serum was calculated and representative results for experimental groups (n=6) were presented as means ± SD. \* $P<0.05$  or \*\* $P<0.01$ , compared to the PCV2 alone group. dpi: days post primary immunization
